# Supplementary material
Source: bioRxiv or medRxiv preprint supplement (https://www.biorxiv.org/highwire/filestream/36702/field_highwire_adjunct_files/10/125211-6.pdf)

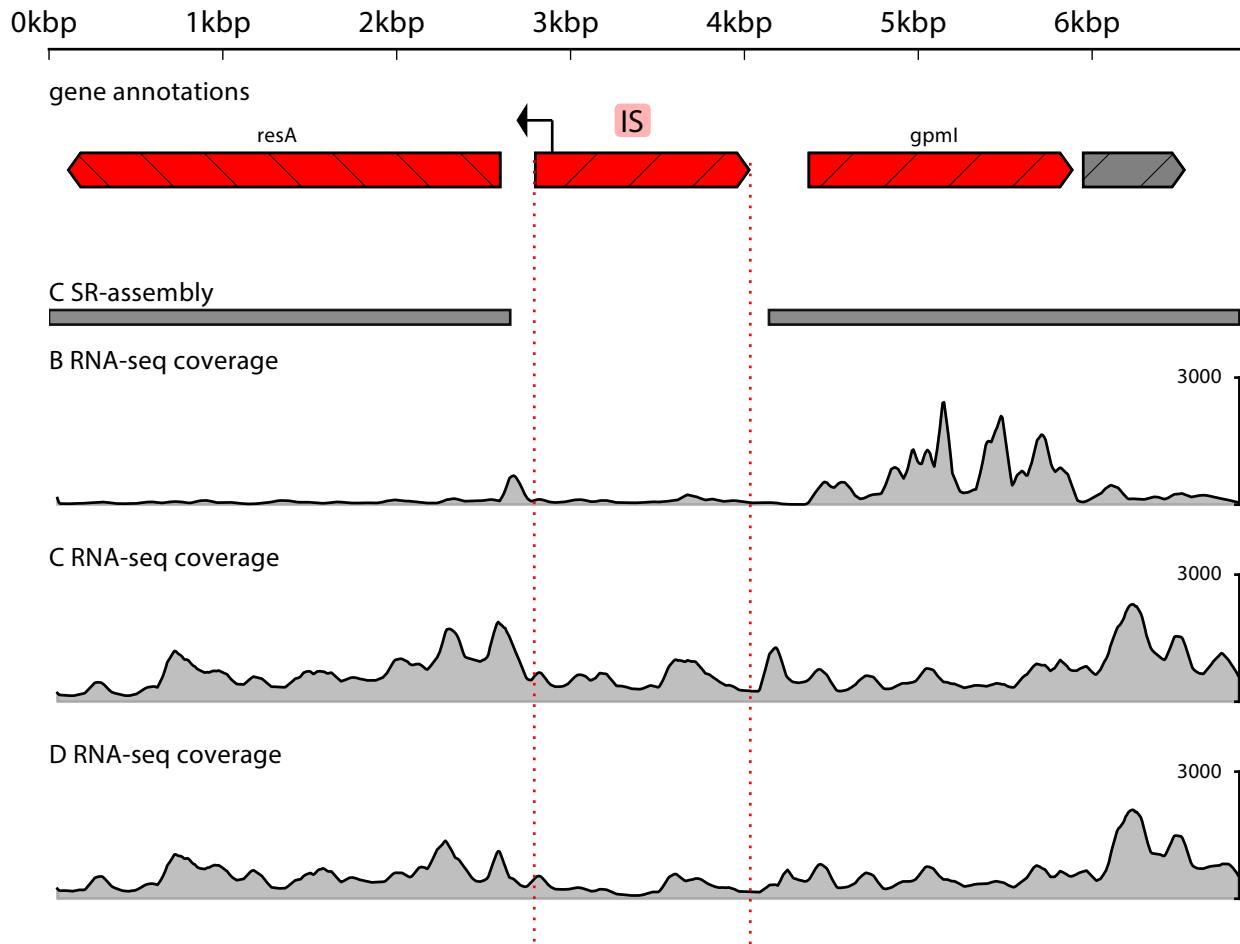

Supplement: Supplementary file [file 125211-6.pdf]
